# Supplementary material for: A Multiplexed Device Based on Tunable Nanoshearing for Specific Detection of Multiple Protein Biomarkers in Serum
Source: PubMed Central journal article supplement (PMC4432869; doi:10.1038/srep09756), 2015-05-15
Supplement: srep09756-s1.pdf [file srep09756-s1.pdf]

## Supplementary Information

for

### **A Multiplexed Device Based on Tunable *Nanoshearing* for Specific Detection of Multiple Protein Biomarkers in Serum**

*Ramanathan Vaidyanathan,<sup>1†</sup> Lara Michelle van Leeuwen,<sup>1†</sup> Sakandar Rauf,<sup>1</sup> Muhammad J. A.*

*Shiddiky,<sup>1\*</sup> Matt Trau<sup>1,2\*</sup>*

*<sup>1</sup> Centre for Personalised Nanomedicine, Australian Institute for Bioengineering and Nanotechnology (AIBN), Corner College and Cooper Roads (Bldg 75), The University of Queensland, Brisbane QLD 4072, Australia*

*<sup>2</sup>School of Chemistry and Molecular Biosciences, The University of Queensland, Brisbane, QLD 4072, Australia*

*\*Email: m.shiddiky@uq.edu.au (M. J. A. S.); m.trau@uq.edu.au (M. T.)*

*† Authors contributed equally*

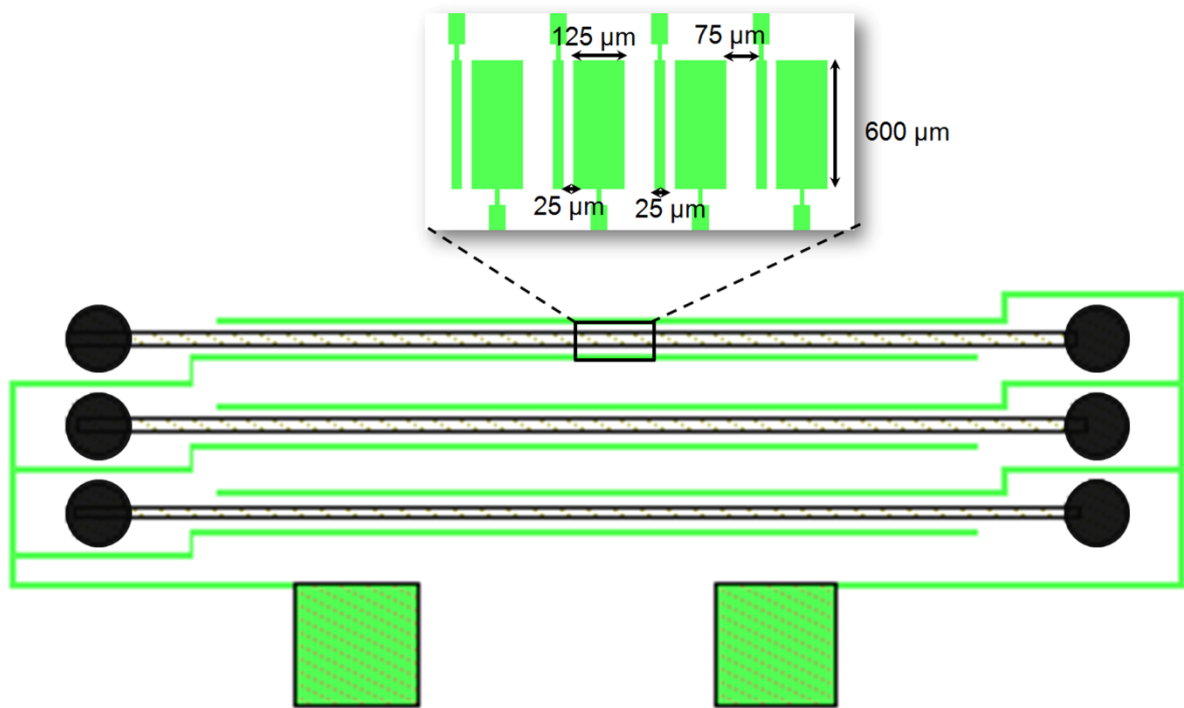

**Supplementary Figure S1 | Design of multiplexed microfluidic device.** Schematic of layout editor design of a multiplexed microfluidic device. The device was designed to contain three individual microfluidic channels with inlets and outlet reservoirs.

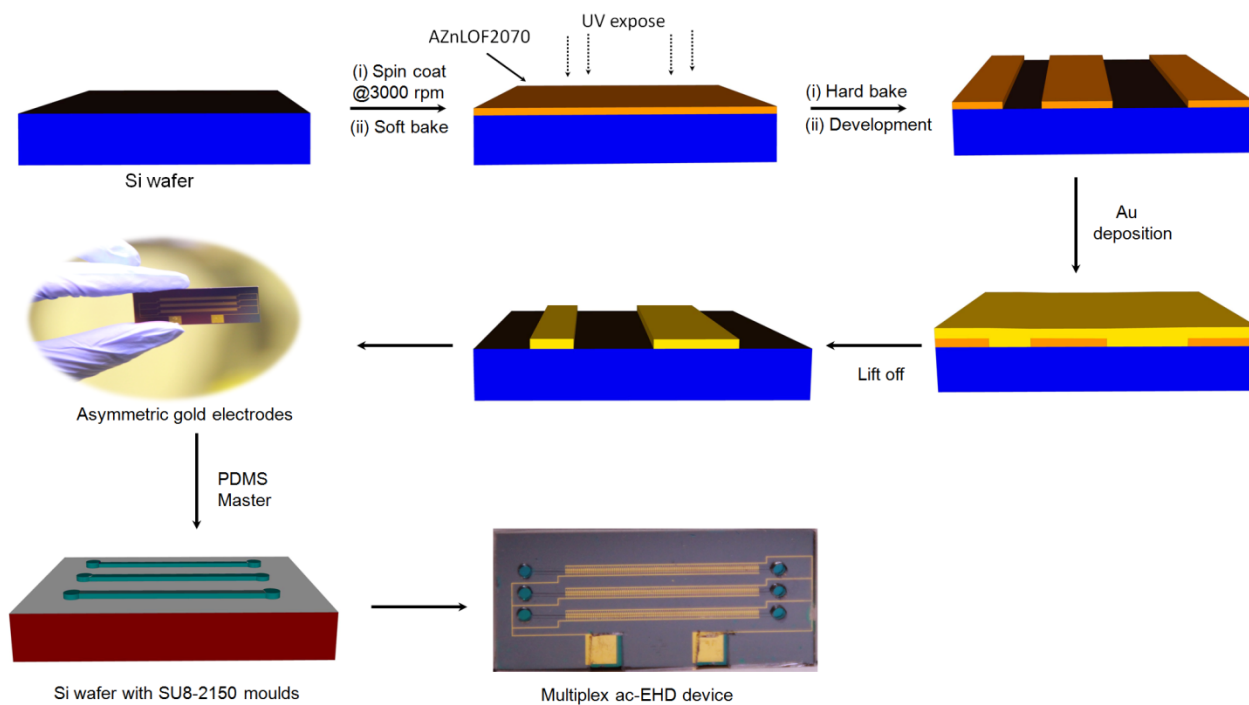

**Supplementary Figure S2 | Fabrication of devices.** Schematic illustration of device fabrication. The multiplexed microfluidic device contains an array of the asymmetric electrode pairs within three individual microfluidic channels.

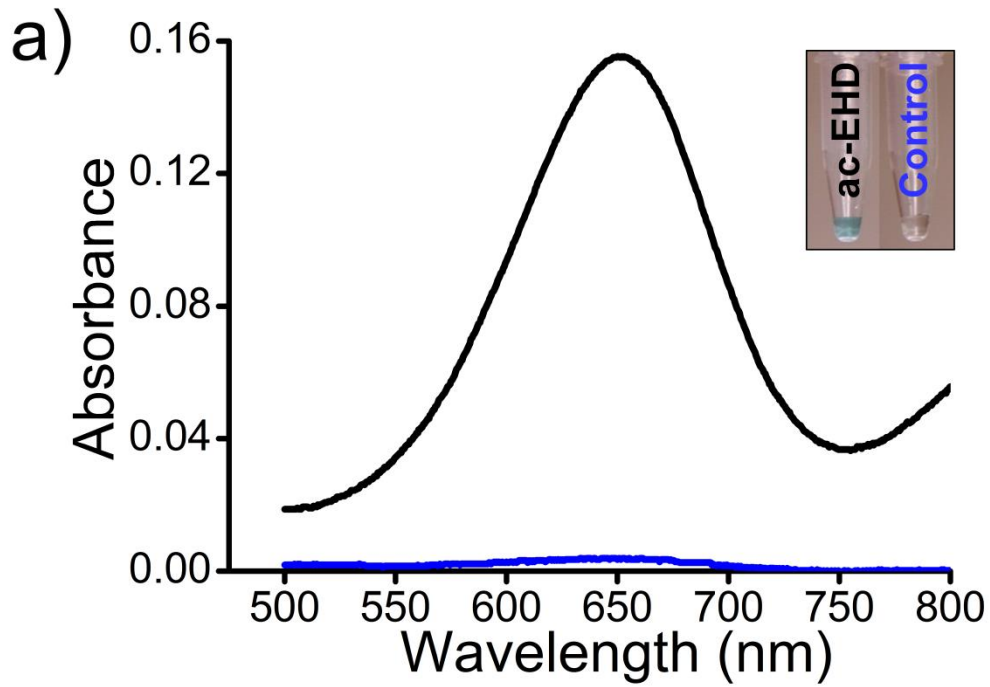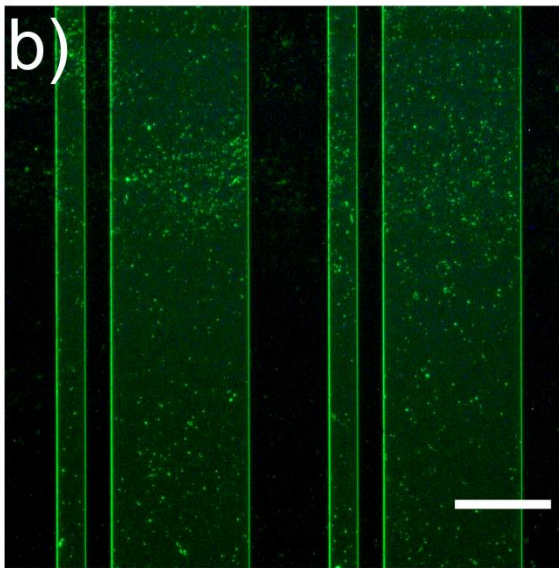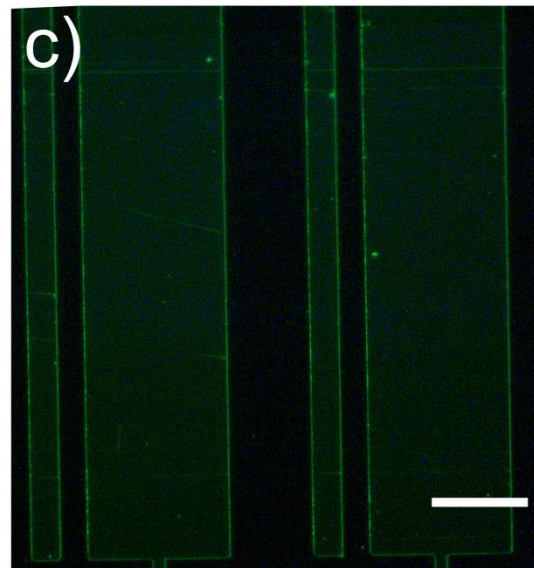

**Supplementary Figure S3 | Protein detection using *nanoshearing* device.** (a) UV-Vis absorbance spectra for serum samples spiked with (black;  $100 \text{ pg mL}^{-1}$ ) and without (blue) HER2 under ac-EHD field strength of  $f = 1 \text{ kHz}$ ,  $V_{pp} = 100 \text{ mV}$ . (b,c) Representative fluorescence images of the (b) detected protein (intensity:  $1.73 \times 10^6$  (counts)) and (c) nonspecifically bound detection antibody (intensity:  $1.08 \times 10^3$  (counts)) under ac-EHD induced fluid flow conditions. Scale bar is  $100 \text{ }\mu\text{m}$ .

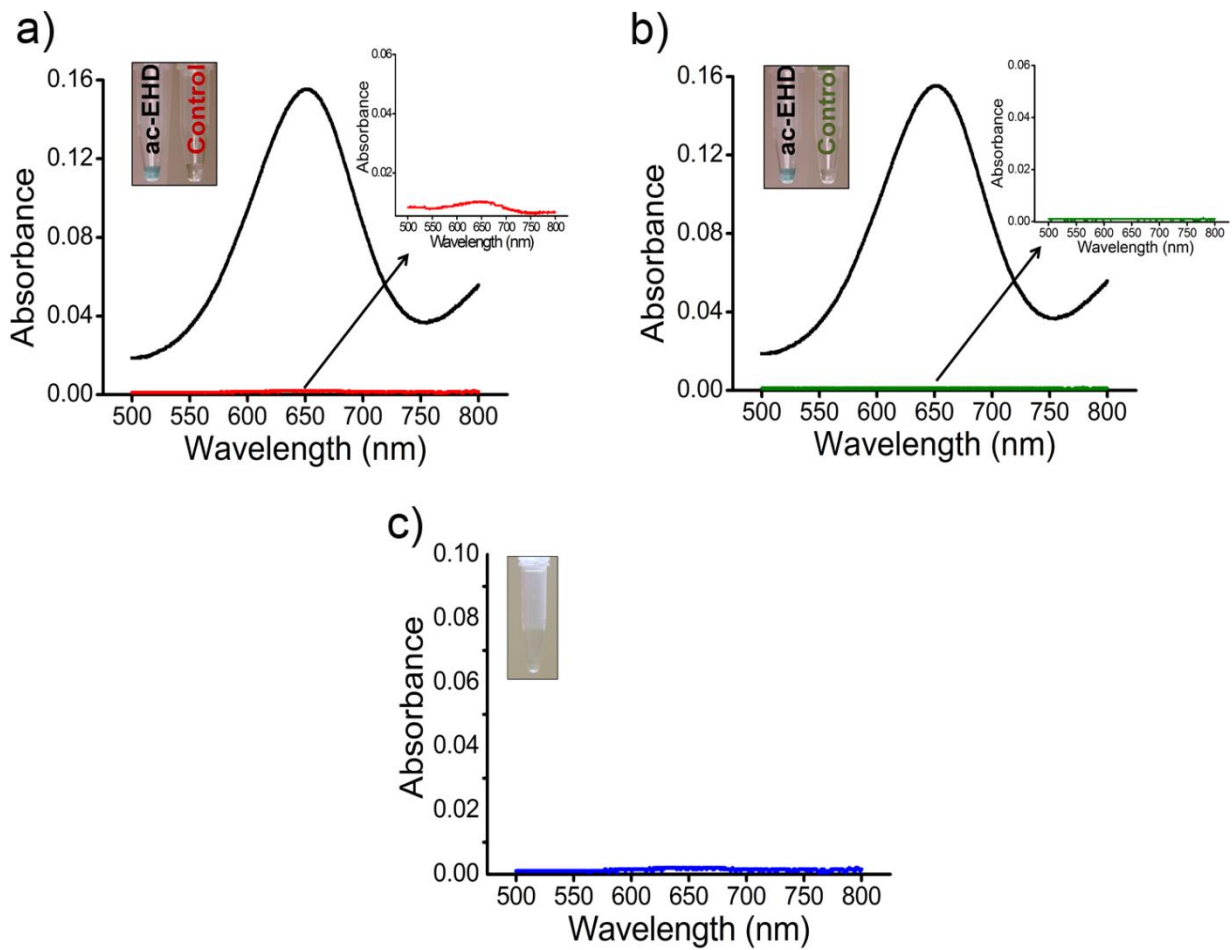

**Supplementary Figure S4 | Specificity of protein capture and detection.** (a, b) UV-Vis absorbance spectra of HER2 (100 pg mL<sup>-1</sup>) spiked in serum driven through the devices (a) with (black) and without (red) anti-HER2 capture antibody, and (b) with (black) and without (green) FITC anti-HER2 detection antibody, under ac-EHD field strength of  $f = 1$  kHz,  $V_{pp} = 100$  mV. (c) UV-Vis absorbance spectra of device incubated with FITC anti-HER2 detection antibody in the absence of capture antibody and target protein.

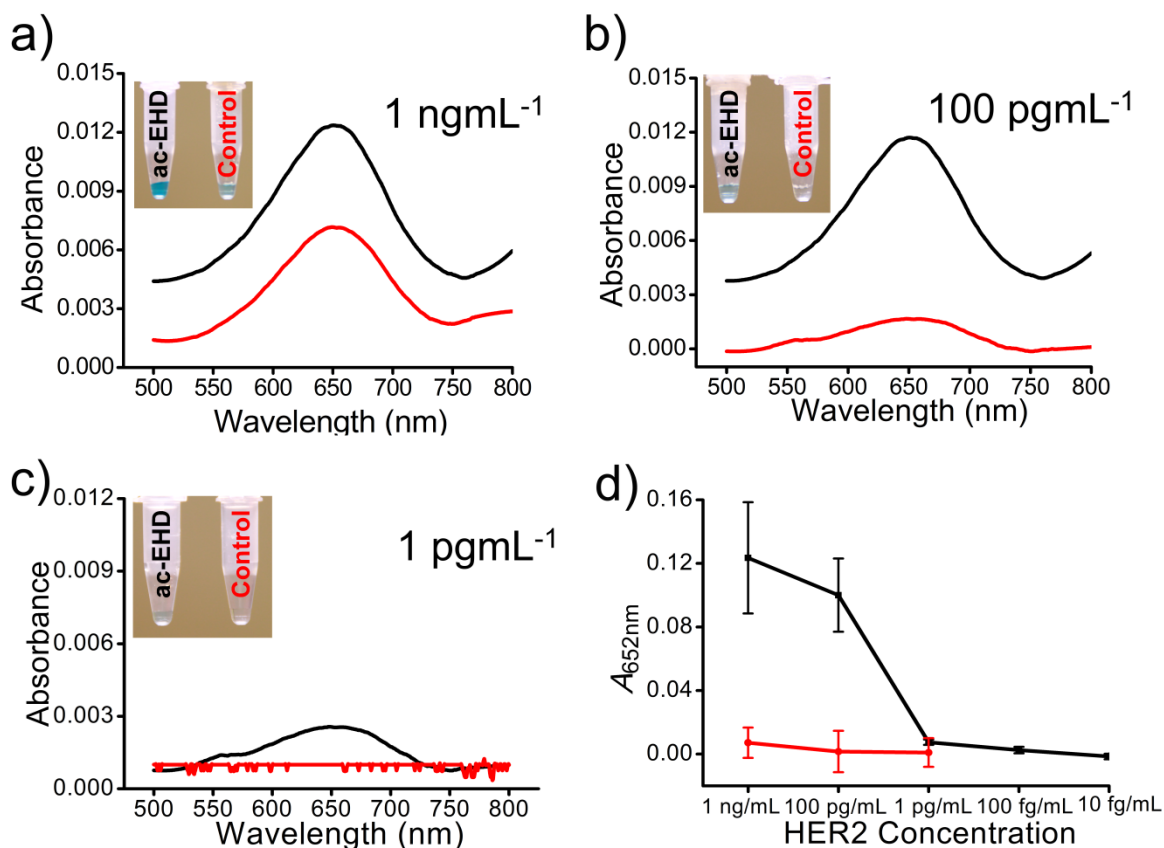

**Supplementary Figure S5 | Protein detection under ac-EHD flow vs hydrodynamic flow.** (a-c) UV-Vis absorbance spectra of the detected HER2 protein spiked in human serum at concentration of (a) 1 ng mL<sup>-1</sup>, (b) 100 pg mL<sup>-1</sup> and (c) 1 pg mL<sup>-1</sup>, respectively under ac-EHD ( $f = 1$  kHz,  $V_{pp} = 100$  mV; black) and pressure driven flow (control; red) conditions. Pressure driven flow based devices operated under the rate of 8  $\mu$ Lmin<sup>-1</sup> (an equivalent flow rate of that calculated based on the time required to flow 1 mL of serum sample under the given ac-EHD field). Inset shows naked eye detection of the detected HER2 protein under ac-EHD and pressure driven flow conditions. (d) Absorbance peak at 652 nm ( $A_{652nm}$ ) for HER2 (1 ng mL<sup>-1</sup> to 10 fg mL<sup>-1</sup>) spiked in serum under ac-EHD ( $f = 1$  kHz,  $V_{pp} = 100$  mV; black) and pressure driven flow (control; red) conditions. Pressure driven flow based devices operated under the rate of 8  $\mu$ Lmin<sup>-1</sup> (an equivalent flow rate of that calculated based on the time required to flow 1 mL of serum sample under the given ac-EHD field). Each data point represents the average of three separate trials ( $n = 3$ ) and error bars represent standard error of measurements within each experiment.

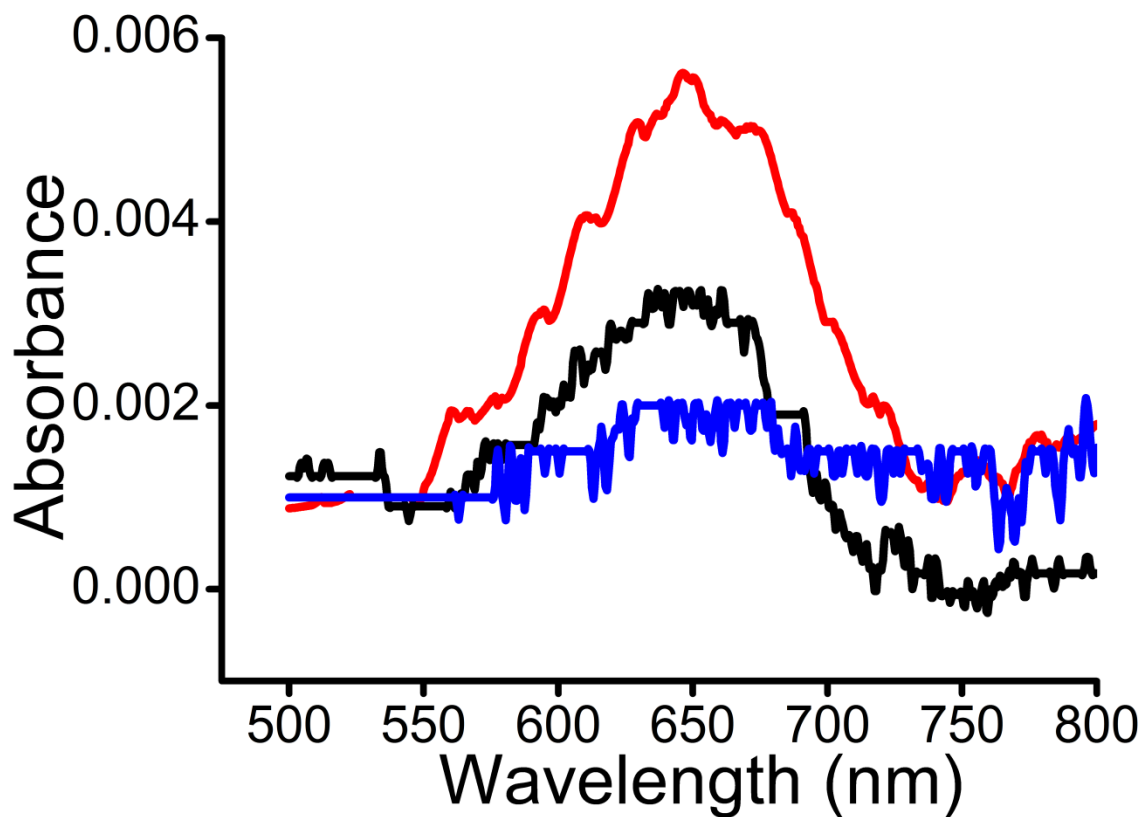

**Supplementary Figure S6 | Specificity of immunocapture.** UV-Vis absorption spectra of serum samples spiked with (red;  $100 \text{ fg mL}^{-1}$ ) and without (black) target HER2 protein along with nonspecific PSA and IgG proteins ( $1 \text{ ng mL}^{-1}$  for both cases) on anti-HER2 functionalized device. The level of background response (nonspecific adsorption of detection antibody; blue) was obtained using serum (without any specific or nonspecific proteins) on the anti-HER2 functionalized device. Data presented was obtained under the ac-EHD field strength of  $f = 1$  kHz at  $V_{pp} = 100$  mV.
